# Supplementary material for: Urinary MMP-9/UCr association with albumin concentration and albumin-creatinine-ratio in Mexican patients with type 2 diabetes mellitus
Source: PeerJ. 2020 Dec 16;8:e10474. doi: 10.7717/peerj.10474 (PMC7749659; doi:10.7717/peerj.10474)
Supplement: Data S1 [file peerj-08-10474-s001.xlsx]

## Sheet: General Data
FOLIO	ENTRY_DATE DD/MM/YY	SEX	ARMS OR LEGS HAVE BEEN AMPUTATED	DID YOU RECEIVE ANTIBIOTICS DURING THE LAST SEVEN DAYS?	WHICH ANTIBIOTICS?	WHY DID YOU RECEIVE ANTIBIOTICS?	DID YOU RECEIVE FENOFIBRATE DURING THE LAST 7 DAYS TO REDUCE TRIGLYCERIDE LEVELS?	DO YOU PACRTICE ANY SPORT, ACTIVITY OR MAKE EXERCISE?	WHAT SPORT/ACTIVITY/EXERCISE DO YOU PACRTICE?	HAVE YOU BEEN TOLD BY A DOCTOR YOU HAVE COPD?	HAVE YOU BEEN TOLD BY A DOCTOR YOU GOT INMUNE DISEASE?	HAVE YOU BEEN TOLD BY A DOCTOR YOU HAVE ANY TYPE OF CANCER?	DOCTOR'S OFFICE NUMBER	SHIFT	AGE	DICHOTOMISED_AGE	BIRTH_DATE DD/MM/YY	PLACE_OF_RESIDENCE	MARITAL_STATUS	DICHOTOMISED_MARITAL_STATUS	CAN_YOU_WRITE AND READ	SCHOOLING	DICHOTOMISED_ SCHOOLING	LEVEL_OF_SCHOOLING	DICHOTOMISED_LEVEL OF SCHOOLING	JOB	CATEGORISED_JOB According to the National Job Classification System (SINCO, a Spanish acronym)	RECATEGORISED_JOB	ECONOMIC_ACTIVITY	INCOME (MEXICAN PESOS)	DICHOTOMISED_INCOME	HOW MANY PEOPLE BENEFIT FROM THE INCOME?	PARENTS WITH A FAMILIY HISTORY OF T2D	PARENTS WITH A FAMILIY HISTORY OF DICHOTOMISED T2D	PARENTS WITH A FAMILIY HISTORY OF HYPERTENSION	PARENTS WITH A FAMILIY HISTORY OF DICHOTOMISED HIPERTENSION	PARENTS WITH A FAMILIY HISTORY OF CHRONIC KIDNEY DISEASE (CDK)	PARENTS WITH A FAMILIY HISTORY OF DICHOTOMISED CDK	PARENTS WITH A FAMILIY HISTORY OF KIDNEY TRASPLANT	PARENTS WITH A FAMILIY HISTORY OF DIALYSIS	PARENTS WITH A FAMILIY HISTORY OF HEMODIALYSIS	PARENTS WITH A FAMILIY HISTORY OF KIDNEY STONES	HISTORY OF SMOKING	CURRENT ACTIVE SMOKING	ONSET AGE OF SMOKING	TIME OF SMOKING (years)	SMOKING QUANTITY	SMOKING FREQUENCY	HISTORY OF ALCOHOLISM
1	25.11.16	Female	No	No	No	No	No	No	None	No	No	No	11	Morning	66	Greater than or equal to 60 years	25.03.50	Xalapa	Widowed	No partner	Yes	Secondary	Greater than Elementary	Basic education	Basic or lower	Trader	Sales employee and sales agent	Employee	With economic activity (employee and unemployed)	1,501-3,000	Less than or equal to 3,000	3	Father	Yes	Mother	Yes	None	No	None	None	None	None	No	No					Yes
3	01.03.17	Female	No	No	No	No	No	No	None	No	No	No	6	Evening	77	Greater than or equal to 60 years	10.11.39	Xalapa	Widowed	No partner	Yes	Elementary	Elementary or lower	Basic education	Basic or lower	Housework	Not applicable	Unemployed	No economic activity (Retirees, housewives, students)	Lower than or equal to a 1,500	Less than or equal to 3,000	1	Mother	Yes	Mother	Yes	Mother	Yes	None	None	None	None	No	No					No
6	28.11.16	Male	No	No	No	No	No	No	None	No	No	No	7	Morning	81	Greater than or equal to 60 years	21.12.34	Xalapa	Married	With partner	Yes	Master	Greater than Elementary	Higher education	Higher and middle education or greater	Housework	Not applicable	Unemployed	No economic activity (Retirees, housewives, students)	15,001-18,000	Greater than 3,000	2	None	No	None	No	None	No	None	None	None	None	Yes	No	20	3	3	Diaria	Yes
9	28.11.16	Female	No	No	No	No	No	No	None	No	No	No	7	Morning	46	Under 60 years	28.12.70	Otilpan, Tlanehuayocan	Married	With partner	Yes	Elementary	Elementary or lower	Basic education	Basic or lower	Trader	Sales employee and sales agent	Employee	With economic activity (employee and unemployed)	Lower than or equal to a 1,500	Less than or equal to 3,000	1	Mother	Yes	Mother	Yes	Mother	Yes	None	Mother	None	None	No	No					Yes
11	28.11.16	Female	No	No	No	No	No	No	None	No	No	No	20	Morning	48	Under 60 years	13.01.78	Xalapa	Married	With partner	Yes	Elementary	Elementary or lower	Basic education	Basic or lower	Janitor	Workers in essential and support activities	Employee	With economic activity (employee and unemployed)	Lower than or equal to a 1,500	Less than or equal to 3,000	2	Both	Yes	None	No	Father	Yes	None	Father	None	None	No	No					Yes
13	29.11.16	Female	No	No	No	No	No	No	None	No	No	No	9	Evening	54	Under 60 years	18.02.62	Xalapa	Married	With partner	Yes	Bachelor's degree	Greater than Elementary	Higher education	Higher and middle education or greater	Teacher	Professionals and technicians	Employee	With economic activity (employee and unemployed)	15,001-18,000	Greater than 3,000	2	Father	Yes	Mother	Yes	None	No	None	None	None	None	Yes	No	15	27	2	Diaria	Yes
14	29.11.16	Female	No	No	No	No	No	No	None	No	No	No	9	Evening	56	Under 60 years	04.06.60	Xalapa	Married	With partner	Yes	Baccalaureate or Technical career	Greater than Elementary	Secondary education	Higher and middle education or greater	Retiree	Not applicable	Retiree	No economic activity (Retirees, housewives, students)	3,001-6,000	Greater than 3,000	4	Both	Yes	Mother	Yes	None	No	None	None	None	None	No	No					Yes
15	29.11.16	Female	No	No	No	No	No	No	None	No	No	No	7	Morning	64	Greater than or equal to 60 years	27.11.52	Xalapa	Single	No partner	Yes	Elementary	Elementary or lower	Basic education	Basic or lower	Housework	Not applicable	Unemployed	No economic activity (Retirees, housewives, students)	6,001-12,000	Greater than 3,000	2	None	No	Mother	Yes	None	No	None	None	None	None	No	No					No
16	01.03.17	Female	No	No	No	No	No	No	None	No	No	No	13	Evening	50	Under 60 years	20.01.67	Xalapa	Married	With partner	Yes	Elementary	Elementary or lower	Basic education	Basic or lower	Housework	Not applicable	Unemployed	No economic activity (Retirees, housewives, students)	6,001-12,000	Greater than 3,000	4	None	No	None	No	None	No	None	None	None	None	No	No					No
20	30.11.16	Female	No	Yes	Cefaclor	Tos	No	No	None	No	No	No	13	Morning	59	Under 60 years	15.03.57	Xalapa	Widowed	No partner	Yes	None	Elementary or lower	None	Basic or lower	Housework	Not applicable	Unemployed	No economic activity (Retirees, housewives, students)	1,501-3,000	Less than or equal to 3,000	3	Mother	Yes	None	No	None	No	None	None	None	None	No	No					Yes
21	30.11.16	Female	No	No	No	No	No	No	None	No	No	No	9	Evening	52	Under 60 years	06.04.64	Xalapa	Single	No partner	Yes	Baccalaureate or Technical career	Greater than Elementary	Secondary education	Higher and middle education or greater	Teacher	Professionals and technicians	Employee	With economic activity (employee and unemployed)	6,001-12,000	Greater than 3,000	2	None	No	Father	Yes	None	No	None	None	None	Father	No	No					No
24	28.02.17	Male	No	No	No	No	No	Yes	Spinning and jogging	No	No	No	13	Evening	57	Under 60 years	12.12.59	Xalapa	Married	With partner	Yes	Bachelor's degree	Greater than Elementary	Higher education	Higher and middle education or greater	Retiree	Not applicable	Retiree	No economic activity (Retirees, housewives, students)	21,001-24,000	Greater than 3,000	4	Father	Yes	Father	Yes	None	No	None	None	None	None	No	No					Yes
25	01.03.17	Male	Yes	No	No	No	No	No	None	No	No	No	6	Evening	58	Under 60 years	12.10.58	Banderilla	In union	With partner	Yes	Secondary	Greater than Elementary	Basic education	Basic or lower	Retiree	Not applicable	Retiree	No economic activity (Retirees, housewives, students)	3,001-6,000	Greater than 3,000	2	Mother	Yes	Mother	Yes	None	No	None	None	None	None	Yes	No	20	29	5	Diaria	Yes
28	23.01.17	Male	No	No	No	No	No	Yes		No	No	No	9	Morning	53	Under 60 years	28.01.64	Xalapa	Divorced	No partner	Yes	Bachelor's degree	Greater than Elementary	Higher education	Higher and middle education or greater	Retiree	Not applicable	Retiree	No economic activity (Retirees, housewives, students)	6,001-12,000	Greater than 3,000	1	Father	Yes	None	No	None	No	None	None	None	Mother	No	No					Yes
29	01.12.16	Female	No	No	No	No	No	No	None	No	No	No	13	Morning	51	Under 60 years	29.12.64	Naolinco	Widowed	No partner	Yes	Secondary	Greater than Elementary	Basic education	Basic or lower	Housework	Not applicable	Unemployed	No economic activity (Retirees, housewives, students)	6,001-12,000	Greater than 3,000	3	Mother	Yes	None	No	None	No	None	None	None	None	No	No					Yes
32	01.12.16	Female	No	No	No	No	No	No	None	No	No	No	11	Morning	82	Greater than or equal to 60 years	16.09.34	Actopan	Married	With partner	Yes	None	Elementary or lower	None	Basic or lower	Housework	Not applicable	Unemployed	No economic activity (Retirees, housewives, students)	1,501-3,000	Less than or equal to 3,000	2	None	No	Both	Yes	None	No	None	None	None	None	No	No					No
33	01.12.16	Female	No	No	No	No	No	No	None	No	No	No	7	Morning	63	Greater than or equal to 60 years	28.07.53	Xalapa	Single	No partner	Yes	Bachelor's degree	Greater than Elementary	Higher education	Higher and middle education or greater	Teacher	Professionals and technicians	Employee	With economic activity (employee and unemployed)	6,001-12,000	Greater than 3,000	3	Both	Yes	Father	Yes	None	No	None	None	None	None	No	No					Yes
35	02.12.16	Female	No	No	No	No	No	No	None	No	No	No	12	Morning	74	Greater than or equal to 60 years	08.04.42	Xalapa	Single	No partner	No	Elementary	Elementary or lower	Basic education	Basic or lower	Housework	Not applicable	Unemployed	No economic activity (Retirees, housewives, students)	Lower than or equal to a 1,500	Less than or equal to 3,000	1	None	No	Mother	Yes	Mother	Yes	None	None	None	None	No	No					No
36	02.12.16	Female	No	Yes	Ampicilin and ciprofloxacin	Strep throat	No	No	None	No	No	No	7	Morning	63	Greater than or equal to 60 years	01.02.57	Xalapa	Widowed	No partner	Yes	None	Elementary or lower	None	Basic or lower	Housework	Not applicable	Unemployed	No economic activity (Retirees, housewives, students)	1,501-3,000	Less than or equal to 3,000	2	Father	Yes	Father	Yes	None	No	None	None	None	None	No	No					Yes
37	02.12.16	Female	No	No	No	No	No	No	None	No	No	No	11	Evening	54	Under 60 years	20.03.62	Two Ríos, Emiliano Zapata	Widowed	No partner	Yes	Bachelor's degree	Greater than Elementary	Higher education	Higher and middle education or greater	Government employee	Auxiliar workers in administrative activities	Employee	With economic activity (employee and unemployed)	6,001-12,000	Greater than 3,000	2	Both	Yes	None	No	None	No	None	None	None	Mother	Yes	No	14	14	20	Diaria	Yes
45	08.12.16	Female	No	No	No	No	No	No	None	No	No	No	13	Morning	60	Greater than or equal to 60 years	03.07.65	Xalapa	Divorced	No partner	Yes	None	Elementary or lower	None	Basic or lower	Housework	Not applicable	Unemployed	No economic activity (Retirees, housewives, students)	Lower than or equal to a 1,500	Less than or equal to 3,000	5	Mother	Yes	Mother	Yes	Father	Yes	None	None	None	Father	No	No					No
46	08.12.16	Female	No	No	No	No	No			No	No	No	12	Morning	55	Under 60 years	22.09.61	Xalapa	Married	With partner	Yes	Bachelor's degree	Greater than Elementary	Higher education	Higher and middle education or greater	Retiree	Not applicable	Retiree	No economic activity (Retirees, housewives, students)	15,001-18,000	Greater than 3,000	3	Father	Yes	None	No	Father	Yes	None	Father	None	Father	No	No					Yes
47	08.12.16	Male	No	No	No	No	No			No	No	No	12	Morning	56	Under 60 years	13.04.60	Xalapa	Married	With partner	Yes	Elementary	Elementary or lower	Basic education	Basic or lower	Retiree	Not applicable	Retiree	No economic activity (Retirees, housewives, students)	15,001-18,000	Greater than 3,000	3	Mother	Yes	None	No	None	No	None	None	None	None	Yes	Yes	45	11	5	Diaria	Yes
48	08.12.16	Female	No	No	No	No	No			No	No	No	12	Morning	46	Under 60 years	11.04.70	Xalapa	In union	With partner	Yes	Secondary	Greater than Elementary	Basic education	Basic or lower	Housework	Not applicable	Unemployed	No economic activity (Retirees, housewives, students)	3,001-6,000	Greater than 3,000	4	Father	Yes	Father	Yes	None	No	None	None	None	None	No	No					No
49	09.12.16	Female	No	No	No	No	No	No	None	No	No	No	7	Morning	68	Greater than or equal to 60 years	14.07.48	Xalapa	Widowed	No partner	Yes	Baccalaureate or Technical career	Greater than Elementary	Secondary education	Higher and middle education or greater	Housework	Not applicable	Unemployed	No economic activity (Retirees, housewives, students)	1,501-3,000	Less than or equal to 3,000	3	Mother	Yes	None	No	None	No	None	None	None	None	No	No					No
54	12.12.16	Male	No	No	No	No	No	No	None	No	No	No	6	Evening	55	Under 60 years	17.01.61	Xalapa	Married	With partner	Yes	Elementary	Elementary or lower	Basic education	Basic or lower	Housework	Not applicable	Unemployed	No economic activity (Retirees, housewives, students)	Lower than or equal to a 1,500	Less than or equal to 3,000	2	None	No	None	No	None	No	None	None	None	None	Yes	No	12	25	6	Diaria	Yes
56	12.12.16	Male	No	No	No	No	No	No	None	No	No	No	9	Morning	68	Greater than or equal to 60 years	30.04.48	Xalapa	Married	With partner	Yes	Master	Greater than Elementary	Higher education	Higher and middle education or greater	Counselling Teacher	Professionals and technicians	Employee	With economic activity (employee and unemployed)	21,001-24,000	Greater than 3,000	5	Both	Yes	Father	Yes	None	No	None	None	None	None	No	No					No
58	13.12.16	Female	No	No	No	No	No	No	None	No	No	No	7	Morning	64	Greater than or equal to 60 years	22.01.52	Xalapa	Married	With partner	Yes	Secondary	Greater than Elementary	Basic education	Basic or lower	Housework	Not applicable	Unemployed	No economic activity (Retirees, housewives, students)	1,501-3,000	Less than or equal to 3,000	2	Father	Yes	Mother	Yes	None	No	None	None	None	None	No	No					No
61	13.12.16	Female	No	No	No	No	No	No	None	No	No	No	6	Morning	64	Greater than or equal to 60 years	04.06.52	Xalapa	Single	No partner	Yes	Bachelor's degree	Greater than Elementary	Higher education	Higher and middle education or greater	Retiree	Not applicable	Retiree	No economic activity (Retirees, housewives, students)	6,001-12,000	Greater than 3,000	6	Mother	Yes	None	No	None	No	None	None	None	None	No	No					No
62	13.12.16	Male	No	No	No	No	No	No	None	No	No	No	7	Morning	80	Greater than or equal to 60 years	20.02.36	Xalapa	Married	With partner	Yes	Baccalaureate or Technical career	Greater than Elementary	Secondary education	Higher and middle education or greater	Retiree	Not applicable	Retiree	No economic activity (Retirees, housewives, students)	6,001-12,000	Greater than 3,000	2	Both	Yes	None	No	None	No	None	None	None	None	No	No					Yes
66	13.12.16	Female	No	No	No	No	No	Yes		No	No	No	11	Evening	74	Greater than or equal to 60 years	19.05.42	Xalapa	Married	With partner	Yes	Bachelor's degree	Greater than Elementary	Higher education	Higher and middle education or greater	Retiree	Not applicable	Retiree	No economic activity (Retirees, housewives, students)	15,001-18,000	Greater than 3,000	1	Both	Yes	Both	Yes	None	No	None	None	None	None	No	No					No
68	14.12.16	Female	No	No	No	No	No	No	None	No	No	No	12	Morning	76	Greater than or equal to 60 years	04.08.60	Xalapa	Widowed	No partner	Yes	Elementary	Elementary or lower	Basic education	Basic or lower	Housework	Not applicable	Unemployed	No economic activity (Retirees, housewives, students)	Does not know/no answer	Does not know/no answer		Father	Yes	Both	Yes	None	No	None	None	None	None	No	No					No
72	14.12.16	Female	No	No	No	No	No	Si		No	No	No	13	Evening	68	Greater than or equal to 60 years	05.03.48	Naolinco	Single	No partner	Yes	Bachelor's degree	Greater than Elementary	Higher education	Higher and middle education or greater	Retiree	Not applicable	Retiree	No economic activity (Retirees, housewives, students)	6,001-12,000	Greater than 3,000	1	Both	Yes	Mother	Yes	None	No	None	None	None	None	No	No					Yes
73	19.12.16	Female	No	No	No	No	No	No	None	No	No	No	6	Morning	68	Greater than or equal to 60 years	30.12.47	Coatepec	Single	No partner	Yes	None	Elementary or lower	None	Basic or lower	Housework	Not applicable	Unemployed	No economic activity (Retirees, housewives, students)	Does not know/no answer	Does not know/no answer		None	No	Mother	Yes	None	No	None	None	None	None	No	No					No
74	19.01.16	Male	No	No	No	No	No	No	None	No	No	No	10	Morning	62	Greater than or equal to 60 years	13.10.54	Xalapa	Widowed	No partner	Yes	Bachelor's degree	Greater than Elementary	Higher education	Higher and middle education or greater	Retiree	Not applicable	Retiree	No economic activity (Retirees, housewives, students)	12,001-15,000	Greater than 3,000	1	Both	Yes	Both	Yes	None	No	None	None	None	Mother	Yes	No	13	29	30	Diaria	Yes
76	20.12.16	Female	No	No	No	No	No			No	No	No	7	Morning	58	Under 60 years	14.10.58	Xalapa	In union	With partner	Yes	Elementary	Elementary or lower	Basic education	Basic or lower	Housework	Not applicable	Unemployed	No economic activity (Retirees, housewives, students)	1,501-3,000	Less than or equal to 3,000	4	None	No	None	No	None	No	None	None	None	None	No	No					No
77	20.12.16	Female	No	No	No	No	No	No	None	No	No	No	7	Morning	60	Greater than or equal to 60 years	28.01.56	Las Vigas	Single	No partner	Yes	Secondary	Greater than Elementary	Basic education	Basic or lower	Retiree	Not applicable	Retiree	No economic activity (Retirees, housewives, students)	6,001-12,000	Greater than 3,000	2	None	No	None	No	None	No	None	None	None	None	Yes	No	21	5	3	Diaria	No
79	20.12.16	Male	No	No	No	No	No	No	None	No	No	No	12	Morning	69	Greater than or equal to 60 years	14.07.47	Xalapa	Married	With partner	Yes	Bachelor's degree	Greater than Elementary	Higher education	Higher and middle education or greater	Retiree	Not applicable	Retiree	No economic activity (Retirees, housewives, students)	6,001-12,000	Greater than 3,000	4	None	No	Both	Yes	None	No	None	None	None	None	No	No					Yes
81	09.01.17	Female	No	No	No	No	No	Yes		No	No	No	7	Morning	56	Under 60 years	01.04.60	Xalapa	Married	With partner	Yes	Baccalaureate or Technical career	Greater than Elementary	Secondary education	Higher and middle education or greater	Housework	Not applicable	Unemployed	No economic activity (Retirees, housewives, students)	Does not know/no answer	Does not know/no answer		None	No	Mother	Yes	None	No	None	None	None	None	No	No					No
82	10.01.17	Female	No	No	No	No	No	No	None	No	No	No	9	Morning	66	Greater than or equal to 60 years	27.12.50	Xalapa	In union	With partner	Yes	Elementary	Elementary or lower	Basic education	Basic or lower	Housework	Not applicable	Unemployed	No economic activity (Retirees, housewives, students)	Does not know/no answer	Does not know/no answer		None	No	None	No	None	No	None	None	None	None	No	No					No
83	10.01.17	Female	No	No	No	No	No	No	None	No	No	No	7	Morning	55	Under 60 years	11.06.61	Xalapa	Married	With partner	Yes	Bachelor's degree	Greater than Elementary	Higher education	Higher and middle education or greater	Retiree	Not applicable	Retiree	No economic activity (Retirees, housewives, students)	18,001-21,000	Greater than 3,000	3	Both	Yes	Both	Yes	Father	Yes	None	None	None	Father	No	No					No
90	12.01.17	Male	No	No	No	No	No	No	None	No	No	No	11	Morning	68	Greater than or equal to 60 years	25.02.48	Xalapa	Married	With partner	Yes	Bachelor's degree	Greater than Elementary	Higher education	Higher and middle education or greater	Retiree	Not applicable	Retiree	No economic activity (Retirees, housewives, students)	Does not know/no answer	Does not know/no answer		Mother	Yes	Both	Yes	None	No	None	None	None	None	Yes	No	24	9	20	Diaria	No
91	12.01.17	Female	No	No	No	No	No	No	None	No	No	No	13	Morning	56	Under 60 years	02.05.60	Xalapa	Divorced	No partner	Yes	Secondary	Greater than Elementary	Basic education	Basic or lower	Government employee	Auxiliar workers in administrative activities	Employee	With economic activity (employee and unemployed)	6,001-12,000	Greater than 3,000	4	Mother	Yes	Mother	Yes	None	No	None	None	None	None	Yes	Yes	50	6	1	Diaria	Yes
93	12.01.17	Female	No	No	No	No	No	No	None	No	No	No	12	Morning	60	Greater than or equal to 60 years	19.06.56	Xalapa	Married	With partner	Yes	None	Elementary or lower	None	Basic or lower	Housework	Not applicable	Unemployed	No economic activity (Retirees, housewives, students)	1,501-3,000	Less than or equal to 3,000	2	None	No	Father	Yes	None	No	None	None	None	None	No	No					No
95	12.01.17	Female	No	No	No	No	No	No	None	No	No	No	6	Evening	81	Greater than or equal to 60 years	05.08.35	Xalapa	Married	With partner	Yes	Elementary	Elementary or lower	Basic education	Basic or lower	Housework	Not applicable	Unemployed	No economic activity (Retirees, housewives, students)	Does not know/no answer	Does not know/no answer		Mother	Yes	None	No	None	No	None	None	None	None	No	No					No
97	13.01.17	Female	No	No	No	No	No	No	None	No	No	No	6	Morning	58	Under 60 years	10.10.58	Xalapa	Separated	No partner	Yes	Secondary	Greater than Elementary	Basic education	Basic or lower	Housework	Not applicable	Unemployed	No economic activity (Retirees, housewives, students)	1,501-3,000	Less than or equal to 3,000	2	Both	Yes	Both	Yes	None	No	None	None	None	None	No	No					No
99	16.01.17	Male	No	No	No	No	No	No	None	No	No	No	6	Morning	57	Under 60 years	08.04.59	Xalapa	Married	With partner	Yes	Master	Greater than Elementary	Higher education	Higher and middle education or greater	Rancher	Workers in agricultural, forestry, livestock, hunting and fishing activities	Employee	With economic activity (employee and unemployed)	12,001-15,000	Greater than 3,000	4	Mother	Yes	None	No	None	No	None	None	None	None	Yes	No	20	6	10	Diaria	Yes
100	16.01.17	Female	No	No	No	No	No	No	None	No	No	No	13	Morning	54	Under 60 years	03.04.62	Xalapa	Divorced	No partner	Yes	Bachelor's degree	Greater than Elementary	Higher education	Higher and middle education or greater	Housework	Not applicable	Unemployed	No economic activity (Retirees, housewives, students)	18,001-21,000	Greater than 3,000	3	Mother	Yes	Father	Yes	None	No	None	None	None	Father	No	No					No
101	16.01.17	Male	No	No	No	No	No	No	None	No	No	No	13	Morning	51	Under 60 years	12.07.65	Xalapa	Married	With partner	Yes	Secondary	Greater than Elementary	Basic education	Basic or lower	Locksmith	Sales employee and sales agent	Employee	With economic activity (employee and unemployed)	1,501-3,000	Less than or equal to 3,000	4	None	No	None	No	None	No	None	None	None	None	No	No					No
103	16.01.17	Female	No	No	No	No	No	No	None	No	No	No	7	Morning	56	Under 60 years	22.04.60	Xalapa	Separated	No partner	Yes	Bachelor's degree	Greater than Elementary	Higher education	Higher and middle education or greater	Trader	Sales employee and sales agent	Employee	With economic activity (employee and unemployed)	3,001-6,000	Greater than 3,000	1	None	No	Father	Yes	None	No	None	None	None	None	No	No					No
104	16.01.17	Female	No	No	No	No	Yes	No	None	No	No	No	11	Evening	53	Under 60 years	01.12.62	Xalapa	Married	With partner	Yes	Bachelor's degree	Greater than Elementary	Higher education	Higher and middle education or greater	Teacher	Professionals and technicians	Employee	With economic activity (employee and unemployed)	6,001-12,000	Greater than 3,000	1	Mother	Yes	None	No	None	No	None	None	None	None	No	No					Yes
105	17.01.17	Female	No	No	No	No	No	No	None	No	No	No	9	Morning	69	Greater than or equal to 60 years	12.11.47	Xalapa	Divorced	No partner	Yes	Bachelor's degree	Greater than Elementary	Higher education	Higher and middle education or greater	Retiree	Not applicable	Retiree	No economic activity (Retirees, housewives, students)	12,001-15,000	Greater than 3,000	1	None	No	None	No	None	No	None	None	None	Father	Yes	No	20	18	7	Diaria	No
110	18.01.17	Male	No	No	No	No	No	No	None	No	No	No	7	Morning	61	Greater than or equal to 60 years	03.09.56	Xalapa	In union	With partner	Yes	Elementary	Elementary or lower	Basic education	Basic or lower	Trader	Sales employee and sales agent	Employee	With economic activity (employee and unemployed)	3,001-6,000	Greater than 3,000	2	Mother	Yes	None	No	None	No	None	None	None	None	Yes	No	12	29	30	Diaria	Yes
111	18.01.17	Male	No	No	No	No	No	No	None	No	No	No	13	Morning	62	Greater than or equal to 60 years	19.12.54	Xalapa	Married	With partner	Yes	Bachelor's degree	Greater than Elementary	Higher education	Higher and middle education or greater	Retiree	Not applicable	Retiree	No economic activity (Retirees, housewives, students)	3,001-6,000	Greater than 3,000	3	Mother	Yes	Mother	Yes	None	No	None	None	None	None	Yes	No	18	10	1	Diaria	Yes
113	01.03.17	Male	No	No	No	No	No	Yes	Zumba	No	No	No	11	Morning	68	Greater than or equal to 60 years	09.03.49	Xalapa	Divorced	No partner	Yes	Baccalaureate or Technical career	Greater than Elementary	Secondary education	Higher and middle education or greater	Government employee	Auxiliar workers in administrative activities	Employee	With economic activity (employee and unemployed)	6,001-12,000	Greater than 3,000	1	None	No	None	No	None	No	None	None	None	None	No	No					No
116	19.01.17	Female	No	No	No	No	No	No	None	No	No	No	9	Morning	62	Greater than or equal to 60 years	16.09.54	Actopan	Married	With partner	Yes	None	Elementary or lower	None	Basic or lower	Housework	Not applicable	Unemployed	No economic activity (Retirees, housewives, students)	Does not know/no answer	Does not know/no answer		None	No	Father	Yes	None	No	None	None	None	None	No	No					No
121	20.01.17	Male	No	No	No	No	No	No	None	No	No	No	12	Evening	58	Under 60 years	26.02.58	Xalapa	Married	With partner	Yes	Master	Greater than Elementary	Higher education	Higher and middle education or greater	Retiree	Not applicable	Retiree	No economic activity (Retirees, housewives, students)	Greater than 24,000	Greater than 3,000	2	Both	Yes	Mother	Yes	Mother	Yes	None	None	None	Mother	No	No					Yes
122	23.01.17	Male	No	No	No	No	No	No	None	No	No	No	12	Morning	82	Greater than or equal to 60 years	16.03.35	Xalapa	Married	With partner	Yes	Bachelor's degree	Greater than Elementary	Higher education	Higher and middle education or greater	Retiree	Not applicable	Retiree	No economic activity (Retirees, housewives, students)	1,501-3,000	Less than or equal to 3,000	2	None	No	None	No	None	No	None	None	None	None	Yes	No	18	32	3	Monthly	Yes
124	23.01.17	Female	No	No	No	No	No	Yes		No	No	No	6	Morning	52	Under 60 years	22.08.64	Banderilla	Married	With partner	Yes	Baccalaureate or Technical career	Greater than Elementary	Secondary education	Higher and middle education or greater	Nurse	Professionals and technicians	Employee	With economic activity (employee and unemployed)	3,001-6,000	Greater than 3,000	3	None	No	None	No	None	No	None	None	None	None	No	No					No
125	23.01.17	Female	No	No	No	No	No	No	None	No	No	No	9	Evening	65	Greater than or equal to 60 years	15.08.51	Xalapa	Married	With partner	Yes	None	Elementary or lower	None	Basic or lower	Housework	Not applicable	Unemployed	No economic activity (Retirees, housewives, students)	1,501-3,000	Less than or equal to 3,000	2	Mother	Yes	None	No	None	No	None	None	None	None	No	No					No
129	24.01.17	Female	No	No	No	No	No	Yes	Walking	No	No	No	11	Morning	61	Greater than or equal to 60 years	03.06.55	Xalapa	Single	No partner	Yes	Elementary	Elementary or lower	Basic education	Basic or lower	Housework	Not applicable	Unemployed	No economic activity (Retirees, housewives, students)	Lower than or equal to a 1,500	Less than or equal to 3,000	1	None	No	Mother	Yes	None	No	None	None	None	None	No	No					No
130	24.01.17	Female	No	No	No	No	No	No	None	No	No	No	6	Morning	73	Greater than or equal to 60 years	24.07.43	Xalapa	Widowed	No partner	Yes	Elementary	Elementary or lower	Basic education	Basic or lower	Housework	Not applicable	Unemployed	No economic activity (Retirees, housewives, students)	3,001-6,000	Greater than 3,000	4	Father	Yes	None	No	None	No	None	None	None	None	No	No					Yes
133	24.01.17	Male	No	No	No	No	No	No	None	No	No	No	6	Morning	81	Greater than or equal to 60 years	29.09.35	Banderilla	Married	With partner	Yes	Elementary	Elementary or lower	Basic education	Basic or lower	Retiree	Not applicable	Retiree	No economic activity (Retirees, housewives, students)	18,001-21,000	Greater than 3,000	3	None	No	None	No	None	No	None	None	None	None	Yes	No	4	47	20	Diaria	Yes
137	25.01.17	Male	No	No	No	No	No	No	None	No	No	No	6	Morning	71	Greater than or equal to 60 years	27.12.45	Xalapa	Married	With partner	Yes	Baccalaureate or Technical career	Greater than Elementary	Secondary education	Higher and middle education or greater	Trader	Sales employee and sales agent	Employee	With economic activity (employee and unemployed)	Does not know/no answer	Does not know/no answer		None	No	None	No	None	No	None	None	None	None	Yes	No	20	36	6	Diaria	Yes
149	01.02.17	Female	No	No	No	No	No	No	None	No	No	No	11	Morning	56	Under 60 years	01.12.60	Xalapa	Married	With partner	Yes	Elementary	Elementary or lower	Basic education	Basic or lower	Housework	Not applicable	Unemployed	No economic activity (Retirees, housewives, students)	Does not know/no answer	Does not know/no answer		None	No	Both	Yes	None	No	None	None	None	None	No	No					No
154	01.02.17	Female	No	No	No	No	No	No	None	No	No	No	13	Morning	74	Greater than or equal to 60 years	22.02.42	Xalapa	Married	With partner	No	None	Elementary or lower	None	Basic or lower	Housework	Not applicable	Unemployed	No economic activity (Retirees, housewives, students)	Does not know/no answer	Does not know/no answer		None	No	None	No	None	No	None	None	None	None	Yes	No	25	0.41	1	Diaria	No
155	02.02.17	Female	No	No	No	No	No	No	None	No	No	No	12	Morning	72	Greater than or equal to 60 years	22.02.45	Xalapa	Married	With partner	Yes	Baccalaureate or Technical career	Greater than Elementary	Secondary education	Higher and middle education or greater	Housework	Not applicable	Unemployed	No economic activity (Retirees, housewives, students)	12,001-15,000	Greater than 3,000	6	None	No	None	No	None	No	None	None	None	None	No	No					No
157	03.02.17	Female	No	No	No	No	No	No	None	No	No	No	13	Morning	37	Under 60 years	27.05.79	Coacoatzintla	Married	With partner	Yes	Baccalaureate or Technical career	Greater than Elementary	Secondary education	Higher and middle education or greater	Housework	Not applicable	Unemployed	No economic activity (Retirees, housewives, students)	3,001-6,000	Greater than 3,000	4	Mother	Yes	Father	Yes	None	No	None	None	None	None	No	No					No
167	08.02.17	Female	No	No	No	No	No	No	None	No	No	No	9	Morning	77	Greater than or equal to 60 years	08.03.38	Xalapa	Single	No partner	Yes	None	Elementary or lower	None	Basic or lower	Housework	Not applicable	Unemployed	No economic activity (Retirees, housewives, students)	Does not know/no answer	Does not know/no answer		Father	Yes	Mother	Yes	None	No	None	None	None	None	No	No					No
168	09.02.17	Male	No	No	No	No	No	No	None	No	No	No	9	Morning	59	Under 60 years	24.01.58	Xalapa	In union	With partner	Yes	Doctorado	Greater than Elementary	Higher education	Higher and middle education or greater	Clerical worker	Auxiliar workers in administrative activities	Employee	With economic activity (employee and unemployed)	6,001-12,000	Greater than 3,000	2	Mother	Yes	Mother	Yes	None	No	None	None	None	None	No	No					No
169	09.02.17	Male	No	Yes	Clindamycin		No	No	None	No	No	No	13	Morning	43	Under 60 years	29.06.73	Xalapa	In union	With partner	Yes	Baccalaureate or Technical career	Greater than Elementary	Secondary education	Higher and middle education or greater	Police	Workers in personal and surveillance services	Employee	With economic activity (employee and unemployed)	3,001-6,000	Greater than 3,000	4	Mother	Yes	Mother	Yes	None	No	None	None	None	Mother	No	No					No
170	09.02.17	Female	No	No	No	No	No	No	None	No	No	No	9	Morning	73	Greater than or equal to 60 years	13.07.42	Xalapa	Married	With partner	Yes	Secondary	Greater than Elementary	Basic education	Basic or lower	Retiree	Not applicable	Retiree	No economic activity (Retirees, housewives, students)	3,001-6,000	Greater than 3,000	2	Mother	Yes	None	No	None	No	None	None	None	None	No	No					Yes
173	10.02.17	Male	No	No	No	No	No	Yes	Walking	No	No	No	9	Morning	68	Greater than or equal to 60 years	07.04.48	Emiliano Zapata	Married	With partner	Yes	Baccalaureate or Technical career	Greater than Elementary	Secondary education	Higher and middle education or greater	Retiree	Not applicable	Retiree	No economic activity (Retirees, housewives, students)	15,001-18,000	Greater than 3,000	2	None	No	None	No	None	No	None	None	None	None	Yes	No	13	35	10	Diaria	Yes
176	13.02.17	Male	No	No	No	No	No	No	None	No	No	No	6	Morning	78	Greater than or equal to 60 years	02.06.39	Xalapa	Married	With partner	Yes	Bachelor's degree	Greater than Elementary	Higher education	Higher and middle education or greater	Retiree	Not applicable	Retiree	No economic activity (Retirees, housewives, students)	6,001-12,000	Greater than 3,000	2	Both	Yes	Mother	Yes	None	No	None	None	None	None	No	No					Yes
177	13.02.17	Female	No	No	No	No	No	No	None	No	No	No	9	Morning	63	Greater than or equal to 60 years	20.11.53	Xalapa	Divorced	No partner	Yes	Secondary	Greater than Elementary	Basic education	Basic or lower	Housework	Not applicable	Unemployed	No economic activity (Retirees, housewives, students)	3,001-6,000	Greater than 3,000	1	None	No	None	No	None	No	None	None	None	None	No	No					Yes
179	13.02.17	Female	No	No	No	No	No	No	None	No	No	No	2	Morning	53	Under 60 years	09.10.63	Ixmatlahuacan	Married	With partner	Yes	Bachelor's degree	Greater than Elementary	Higher education	Higher and middle education or greater	Teacher	Professionals and technicians	Employee	With economic activity (employee and unemployed)	3,001-6,000	Greater than 3,000	3	Mother	Yes	None	No	Mother	Yes	None	None	None	Mother	No	No					Yes
183	14.02.17	Male	No	Yes			No	No	None	No	No	No	6	Evening	59	Under 60 years	25.11.57	Xalapa	Married	With partner	Yes	Bachelor's degree	Greater than Elementary	Higher education	Higher and middle education or greater	Accountant	Professionals and technicians	Employee	With economic activity (employee and unemployed)	1,501-3,000	Less than or equal to 3,000	2	Father	Yes	None	No	None	No	None	None	None	None	No	No					No
184	14.02.17	Female	No	Yes			No	No	None	No	No	No	7	Evening	60	Greater than or equal to 60 years	05.08.56	Xalapa	Married	With partner	Yes	Elementary	Elementary or lower	Basic education	Basic or lower	Housework	Not applicable	Unemployed	No economic activity (Retirees, housewives, students)	3,001-6,000	Greater than 3,000	2	Both	Yes	Mother	Yes	None	No	None	None	None	None	No	No					No
190	15.02.17	Female	No	No	No	No	No	No	None	No	No	No	10	Morning	79	Greater than or equal to 60 years	16.06.37	Xalap	Married	With partner	Yes	Bachelor's degree	Greater than Elementary	Higher education	Higher and middle education or greater	Housework	Not applicable	Unemployed	No economic activity (Retirees, housewives, students)	Does not know/no answer	Does not know/no answer		Father	Yes	Both	Yes	None	No	None	None	None	None	No	No					Yes
193	15.02.17	Female	No	No	No	No	No	No	None	No	No	No	10	Evening	67	Greater than or equal to 60 years	24.02.49	Xalapa	Single	No partner	Yes	Baccalaureate or Technical career	Greater than Elementary	Secondary education	Higher and middle education or greater	Retiree	Not applicable	Retiree	No economic activity (Retirees, housewives, students)	Greater than 24,000	Greater than 3,000	4	Father	Yes	None	No	None	No	None	None	None	None	Yes	No	23	17	2	Diaria	Yes
194	15.02.17	Female	No	No	No	No	No	No	None	No	No	No	7	Evening	59	Under 60 years	24.10.57	Xalapa	Single	No partner	Yes	Baccalaureate or Technical career	Greater than Elementary	Secondary education	Higher and middle education or greater	Retiree	Not applicable	Retiree	No economic activity (Retirees, housewives, students)	6,001-12,000	Greater than 3,000	1	Father	Yes	Mother	Yes	None	No	None	None	None	None	Yes	No	19	15	3	Diaria	Yes
195	16.02.17	Male	No	No	No	No	No	Yes	Walking	No	No	No	12	Morning	68	Greater than or equal to 60 years	12.12.48	Xalapa	Married	With partner	Yes	Bachelor's degree	Greater than Elementary	Higher education	Higher and middle education or greater	Retiree	Not applicable	Retiree	No economic activity (Retirees, housewives, students)	12,001-15,000	Greater than 3,000	2	None	No	Mother	Yes	None	No	None	None	None	None	Yes	No	25	5	4	Diaria	Yes
196	16.02.17	Male	No	No	No	No	No	No	None	No	No	No	10	Morning	55	Under 60 years	02.07.61	Jalacingo, Ver	Divorced	No partner	Yes	Secondary	Greater than Elementary	Basic education	Basic or lower	Housework	Not applicable	Unemployed	No economic activity (Retirees, housewives, students)	3,001-6,000	Greater than 3,000	4	Mother	Yes	None	No	None	No	None	None	None	None	Yes	No	21	5	2	Diaria	Yes
197	16.02.17	Male	No	No	No	No	No	No	None	No	No	No	12	Morning	71	Greater than or equal to 60 years	24.03.45	Naolínco	Married	With partner	Yes	Bachelor's degree	Greater than Elementary	Higher education	Higher and middle education or greater	Retiree	Not applicable	Retiree	No economic activity (Retirees, housewives, students)	15,001-18,000	Greater than 3,000	2	None	No	None	No	None	No	None	None	None	None	Yes	No	7	10	2	Diaria	Yes
199	16.02.17	Female	No	Yes			No	No	None	No	No	No	7	Evening	73	Greater than or equal to 60 years	07.07.43	Xalapa	Married	With partner	Yes	Secondary	Greater than Elementary	Basic education	Basic or lower	Housework	Not applicable	Unemployed	No economic activity (Retirees, housewives, students)	6,001-12,000	Greater than 3,000	2	Father	Yes	None	No	None	No	None	None	None	None	Yes	No	12	19	2	Diaria	Yes
200	16.02.17	Female	No	No	No	No	No	Yes		No	No	No	9	Evening	79	Greater than or equal to 60 years	15.05.37	Xalapa	Widowed	No partner	Yes	Elementary	Elementary or lower	Basic education	Basic or lower	Housework	Not applicable	Unemployed	No economic activity (Retirees, housewives, students)	Does not know/no answer	Does not know/no answer		None	No	None	No	None	No	None	None	None	None	No	No					No
203	17.02.17	Female	No	No	No	No	No	No	None	No	No	No	7	Evening	53	Under 60 years	10.03.63	Xalapa	Married	With partner	Yes	Elementary	Elementary or lower	Basic education	Basic or lower	Housework	Not applicable	Unemployed	No economic activity (Retirees, housewives, students)	Lower than or equal to a 1,500	Less than or equal to 3,000	3	Mother	Yes	None	No	None	No	None	None	None	None	No	No					No
206	20.02.17	Female	No	No	No	No	No	No	None	No	No	No	13	Morning	43	Under 60 years	14.06.73	El Espinal, Naolínco	Married	With partner	Yes	Secondary	Greater than Elementary	Basic education	Basic or lower	Housework	Not applicable	Unemployed	No economic activity (Retirees, housewives, students)	3,001-6,000	Less than or equal to 3,000	4	Mother	Yes	Mother	Yes	None	No	None	None	None	None	Yes	No	19	9	12	Diaria	Yes
207	20.02.17	Female	No	Yes			No	Yes		No	No	No	12	Evening	43	Under 60 years	14.06.73	Xalapa	Married	With partner	Yes	Baccalaureate or Technical career	Greater than Elementary	Secondary education	Higher and middle education or greater	Housework	Not applicable	Unemployed	No economic activity (Retirees, housewives, students)	Does not know/no answer	Does not know/no answer		Both	Yes	Both	Yes	None	No	None	None	None	Father	No	No					Yes
209	21.02.17	Male	No	Yes			No	Yes	Walking	No	No	No	10	Morning	62	Greater than or equal to 60 years	11.09.54	Xalapa	Married	With partner	Yes	Bachelor's degree	Greater than Elementary	Higher education	Higher and middle education or greater	Retiree	Not applicable	Retiree	No economic activity (Retirees, housewives, students)	18,001-21,000	Greater than 3,000	4	None	No	None	No	None	No	None	None	None	None	Yes	No	20	22	20	Weekly	Yes
210	21.02.17	Female	No	No	No	No	No	No	None	No	No	No	7	Morning	56	Under 60 years	19.03.60	Xalapa	Divorced	No partner	Yes	Master	Greater than Elementary	Higher education	Higher and middle education or greater	Theatre director	Directors and chief officers	Employee	With economic activity (employee and unemployed)	6,001-12,000	Greater than 3,000	2	None	No	Mother	Yes	None	No	None	None	None	None	No	No					Yes
213	21.02.17	Male	No	Yes			No	No	None	No	No	No	7	Evening	56	Under 60 years	28.11.60	Xalapa	Married	With partner	Yes	Bachelor's degree	Greater than Elementary	Higher education	Higher and middle education or greater	Government employee	Auxiliar workers in administrative activities	Employee	With economic activity (employee and unemployed)	Does not know/no answer	Does not know/no answer		None	No	None	No	None	No	None	None	None	Mother	No	No					Yes
215	22.02.17	Female	No	No	No	No	No	No	None	No	No	No	13	Morning	50	Under 60 years	29.09.66	San Miguel del Soldado	Married	With partner	Yes	Elementary	Elementary or lower	Basic education	Basic or lower	Housework	Not applicable	Unemployed	No economic activity (Retirees, housewives, students)	Lower than or equal to a 1,500	Less than or equal to 3,000	4	None	No	Mother	Yes	None	No	None	None	None	None	Yes	No	16	14	3	Diaria	Yes
218	22.02.17	Male	No	No	No	No	No	Yes	Walking	No	No	No	6	Morning	57	Under 60 years	23.01.60	Xalapa	Married	With partner	Yes	Bachelor's degree	Greater than Elementary	Higher education	Higher and middle education or greater	Retiree	Not applicable	Retiree	No economic activity (Retirees, housewives, students)	Greater than 24,000	Greater than 3,000	2	None	No	Father	Yes	None	No	None	None	None	None	No	No					Yes
219	24.02.17	Male	No	No	No	No	No	No	None	No	No	No	13	Morning	64	Greater than or equal to 60 years	18.10.52	Xalapa	Married	With partner	Yes	Bachelor's degree	Greater than Elementary	Higher education	Higher and middle education or greater	Retiree	Not applicable	Retiree	No economic activity (Retirees, housewives, students)	6,001-12,000	Greater than 3,000	3	None	No	Mother	Yes	Father	Yes	None	Father	None	None	Yes	Yes	15	49	10	Monthly	Yes
223	27.02.17	Male	No	No	No	No	No	No	None	No	No	No	11	Morning	68	Greater than or equal to 60 years	22.11.48	Xalapa	Married	With partner	Yes	Bachelor's degree	Greater than Elementary	Higher education	Higher and middle education or greater	Retiree	Not applicable	Retiree	No economic activity (Retirees, housewives, students)	1,501-3,000	Less than or equal to 3,000	1	Father	Yes	Father	Yes	None	No	None	None	None	None	No	No					Yes
225	27.02.17	Female	No	No	No	No	No	No	None	No	No	No	13	Morning	52	Under 60 years	25.10.64	Xalapa	Married	With partner	Yes	Baccalaureate or Technical career	Greater than Elementary	Secondary education	Higher and middle education or greater	Housework	Not applicable	Unemployed	No economic activity (Retirees, housewives, students)	Does not know/no answer	Does not know/no answer		Father	Yes	Father	Yes	None	No	None	None	None	Father	No	No					No
226	27.02.17	Female	No	No	No	No	No	Yes	Walking	No	No	No	12	Morning	47	Under 60 years	30.06.69	Xalapa	Married	With partner	Yes	Baccalaureate or Technical career	Greater than Elementary	Secondary education	Higher and middle education or greater	Janitor	Workers in essential and support activities	Employee	With economic activity (employee and unemployed)	3,001-6,000	Greater than 3,000	4	Father	Yes	Mother	Yes	None	No	None	None	None	None	No	No					No
227	27.02.17	Female	No	Yes	Ciprofloxacin	Tonsilitis	No	No	None	No	No	No	7	Morning	62	Greater than or equal to 60 years	09.02.55	Xalapa	Single	No partner	Yes	Bachelor's degree	Greater than Elementary	Higher education	Higher and middle education or greater	Housework	Not applicable	Unemployed	No economic activity (Retirees, housewives, students)	3,001-6,000	Greater than 3,000	5	Mother	Yes	Mother	Yes	None	No	None	None	None	None	No	No					Yes
229	27.02.17	Female	No	No	No	No	No	No	None	No	No	No	6	Evening	65	Greater than or equal to 60 years	05.08.51	Xalapa	Married	With partner	Yes	Elementary	Elementary or lower	Basic education	Basic or lower	Housework	Not applicable	Unemployed	No economic activity (Retirees, housewives, students)	6,001-12,000	Greater than 3,000	2	None	No	None	No	None	No	None	None	None	None	Yes	No	26	10	2	Diaria	No
231	28.02.17	Male	No	No	No	No	No	No	None	No	No	No	6	Morning	55	Under 60 years	20.07.61	Xalapa	In union	With partner	Yes	Elementary	Elementary or lower	Basic education	Basic or lower	Chofer	Operators of powered industrial equipment, assemblers, drivers and transport drivers	Employee	With economic activity (employee and unemployed)	3,001-6,000	Greater than 3,000	3	None	No	None	No	None	No	None	None	None	None	No	No					Yes
236	02.03.17	Male	No	No	No	No	No	No	None	No	No	No	13	Evening	62	Greater than or equal to 60 years	30.06.55	El Espinal, Naolinco	Married	With partner	Yes	Baccalaureate or Technical career	Greater than Elementary	Secondary education	Higher and middle education or greater	Chofer	Operators of powered industrial equipment, assemblers, drivers and transport drivers	Employee	With economic activity (employee and unemployed)	3,001-6,000	Greater than 3,000	1	Father	Yes	Both	Yes	Mother	Yes	None	None	None	None	Yes	No	14	24	40	Diaria	Yes
240	03.03.17	Female	No	No	No	No	No	Yes	Spinning and jogging	No	No	No	7	Morning	63	Greater than or equal to 60 years	06.06.53	Xalapa	Married	With partner	Yes	Bachelor's degree	Greater than Elementary	Higher education	Higher and middle education or greater	Retiree	Not applicable	Retiree	No economic activity (Retirees, housewives, students)	Does not know/no answer	Does not know/no answer		Both	Yes	Father	Yes	Father	Yes	None	None	Father	None	No	No					Yes
242	06.03.17	Male	No	No	No	No	No	No	None	No	No	No	9	Evening	36	Under 60 years	13.10.80	Xalapa	Married	With partner	Yes	Baccalaureate or Technical career	Greater than Elementary	Secondary education	Higher and middle education or greater	Gas distributor	Sales employee and sales agent	Employee	With economic activity (employee and unemployed)	3,001-6,000	Greater than 3,000	2	None	No	None	No	None	No	None	None	None	None	Yes	Yes	25	11	3	Weekly	Yes
243	06.03.17	Female	No	No	No	No	No	No	None	No	No	No	12	Evening	63	Greater than or equal to 60 years	12.06.53	Xalapa	Widowed	No partner	Yes	Elementary	Elementary or lower	Basic education	Basic or lower	Housework	Not applicable	Unemployed	No economic activity (Retirees, housewives, students)	Does not know/no answer	Does not know/no answer		Father	Yes	Father	Yes	Mother	Yes	None	None	None	Mother	No	No					No
245	08.03.17	Female	No	No	No	No	No	No	None	No	No	No	7	Evening	48	Under 60 years	30.03.68	Xalapa	Single	No partner	Yes	Bachelor's degree	Greater than Elementary	Higher education	Higher and middle education or greater	Teacher	Professionals and technicians	Employee	With economic activity (employee and unemployed)	3,001-6,000	Greater than 3,000	2	Mother	Yes	None	No	None	No	None	None	None	None	No	No					No
246	08.03.17	Female	No	No	No	No	No	Yes		No	No	No	7	Evening	73	Greater than or equal to 60 years	27.03.43	Xalapa	Single	No partner	Yes	Elementary	Elementary or lower	Basic education	Basic or lower	Clerical worker	Auxiliar workers in administrative activities	Employee	With economic activity (employee and unemployed)	3,001-6,000	Greater than 3,000	2	None	No	None	No	None	No	None	None	None	None	Yes	Yes	40	33	2	Diaria	No
247	09.03.17	Female	No	No	No	No	No	No	None	No	No	No		Morning	55	Under 60 years	28.08.61	Xalapa	Single	No partner	Yes	Baccalaureate or Technical career	Greater than Elementary	Secondary education	Higher and middle education or greater	Retiree	Not applicable	Retiree	No economic activity (Retirees, housewives, students)	1,501-3,000	Less than or equal to 3,000	2	Mother	Yes	Mother	Yes	None	No	None	None	None	None	Yes	No	13	22	40	Diaria	Yes
249	10.03.17	Male	No	No	No	No	No	No	None	No	No	No	9	Morning	43	Under 60 years	22.02.74	Xalapa	Married	With partner	Yes	Master	Greater than Elementary	Higher education	Higher and middle education or greater	Teacher	Professionals and technicians	Employee	With economic activity (employee and unemployed)	15,001-18,000	Greater than 3,000	5	Both	Yes	Both	Yes	Father	Yes	None	Father	None	None	Yes	No	18	2	10	Diaria	Yes
250	13.03.17	Female	No	No	No	No	No	Yes		No	No	No	10	Morning	44	Under 60 years	06.11.72	Xalapa	Married	With partner	Yes	Baccalaureate or Technical career	Greater than Elementary	Secondary education	Higher and middle education or greater	Housework	Not applicable	Unemployed	No economic activity (Retirees, housewives, students)	6,001-12,000	Greater than 3,000	5	Mother	Yes	Father	Yes	None	No	None	None	None	None	Yes	No	16	8	6	Diaria	Yes
252	15.03.17	Male	No	No	No	No	No	Yes	Walking	No	No	No		Morning	65	Greater than or equal to 60 years	06.05.51	Xalapa	Married	With partner	Yes	Bachelor's degree	Greater than Elementary	Higher education	Higher and middle education or greater	Retiree	Not applicable	Retiree	No economic activity (Retirees, housewives, students)	6,001-12,000	Greater than 3,000	2	Both	Yes	Mother	Yes	Mother	Yes	None	Mother	None	Mother	No	No					Yes
[truncated: 260 more columns]
